# Supplementary material for: A novel Ni3N/graphene nanocomposite as supercapacitor electrode material with high capacitance and energy density
Source: Royal Society of Chemistry journal article supplement (doi:10.1039/c5ta03830h), 2015-01-01
Supplement: c5ta03830h1.pdf [file c5ta03830h1.pdf]

## Supporting Information

### A Novel Ni<sub>3</sub>N/Graphene Nanocomposite as Supercapacitor Electrode Material with High Capacitance and Energy Density

Yu Yu, Wenyu Gao, Zongxu Shen, Qing Zheng, Hao Wu, Xi Wang, Weiguo Song\*, and Kejian Ding\*

\* Prof. Kejian Ding, Email: dkjian@bjtu.edu.cn  
Prof. Weiguo Song, Email: wsong@iccas.ac.cn

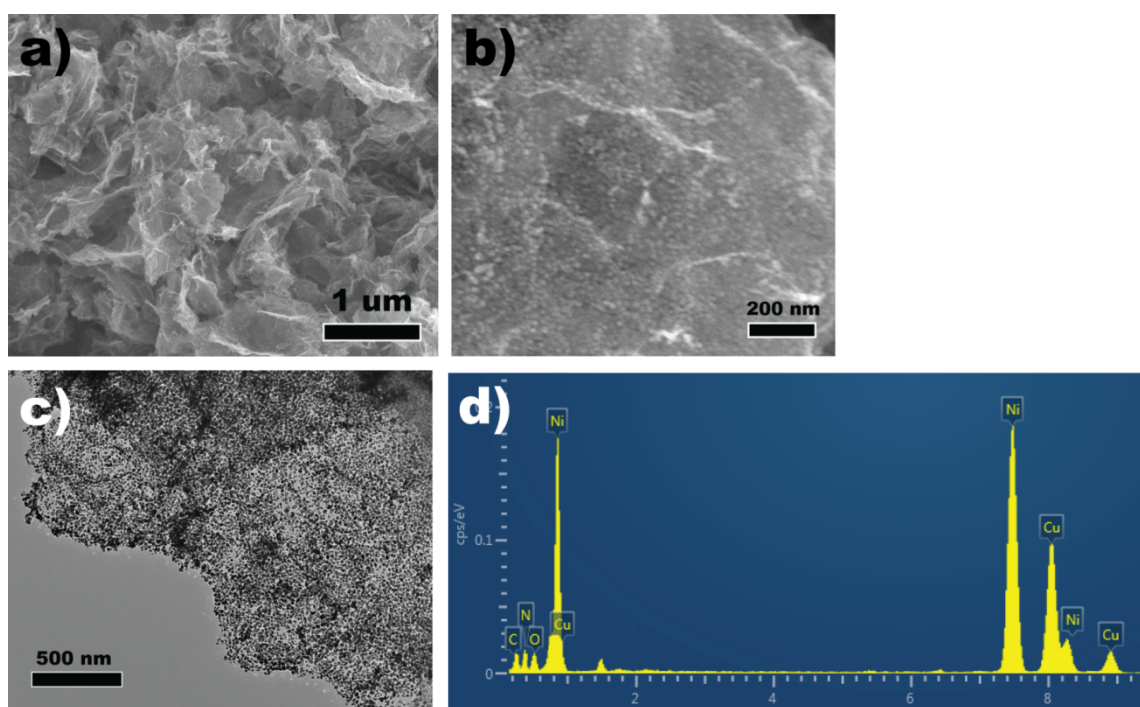

**Figure S1** a, b) Low resolution SEM, c) TEM images and d) EDS spectrum of Ni<sub>3</sub>N/RGO nanocomposite.

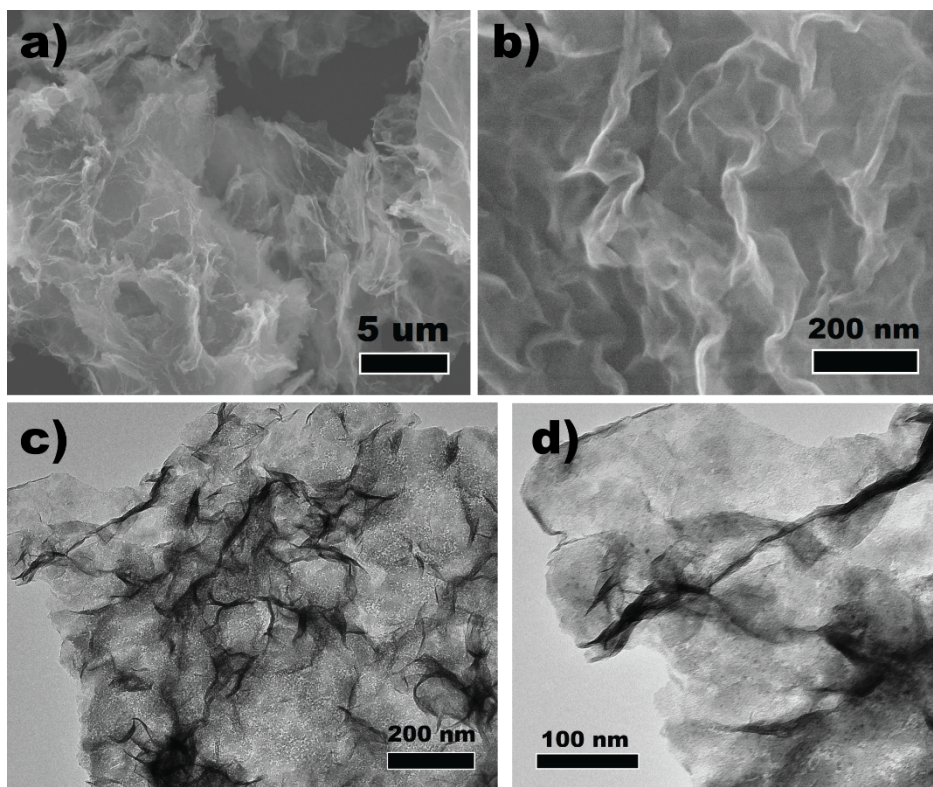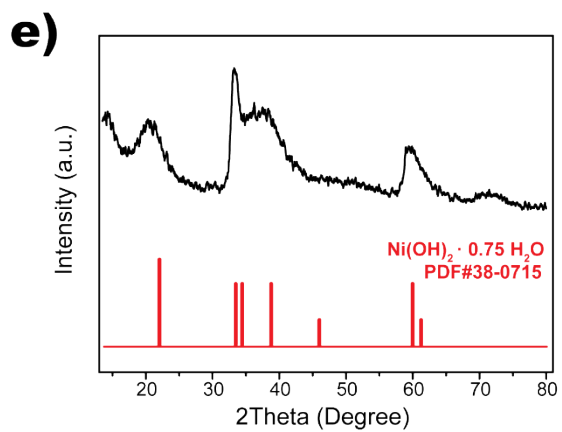

**Figure S2** a, b) SEM, c, d) TEM image, and e) XRD pattern of nickel hydroxide hydrate/RGO precursor.

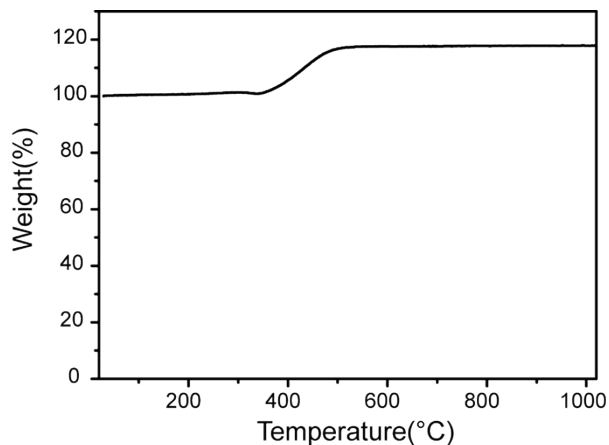

**Figure S3** TGA result of pure Ni<sub>3</sub>N nanoparticles.

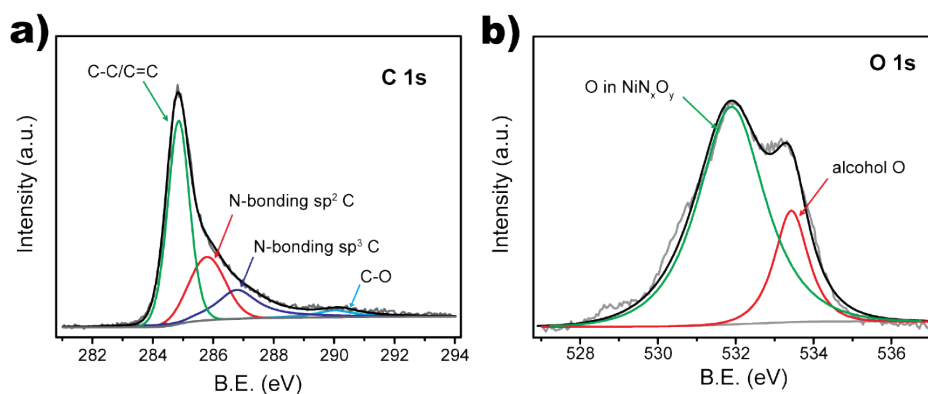

**Figure S4** a) C 1s and d) O 1s XPS spectra of Ni<sub>3</sub>N/RGO nanocomposite.

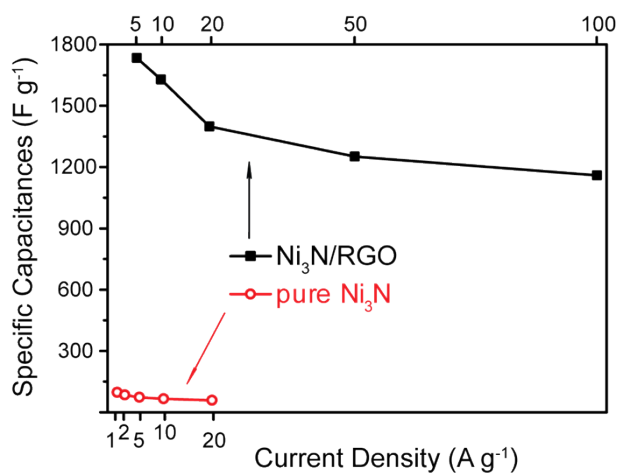

**Figure S5** The comparison of specific capacitance of Ni<sub>3</sub>N/RGO nanocomposite and pure Ni<sub>3</sub>N nanoparticles.

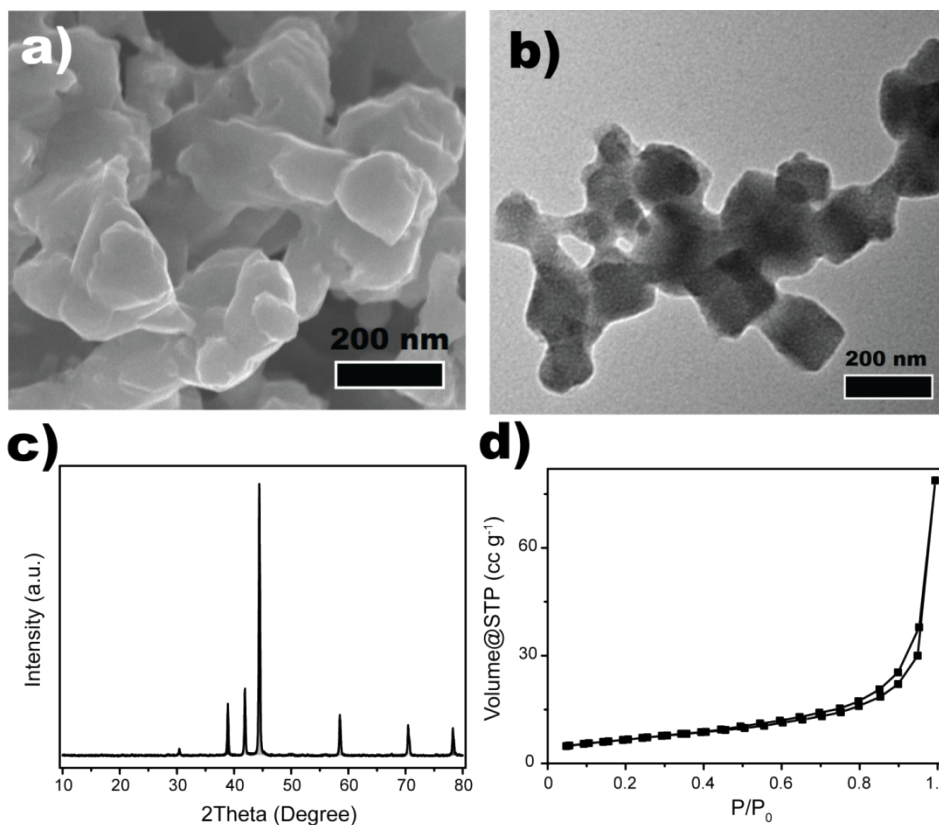

**Figure S6** a) SEM, b) TEM image, c) XRD pattern, and d)  $N_2$  adsorption-desorption isotherm curve of pure  $Ni_3N$  nanoparticles.

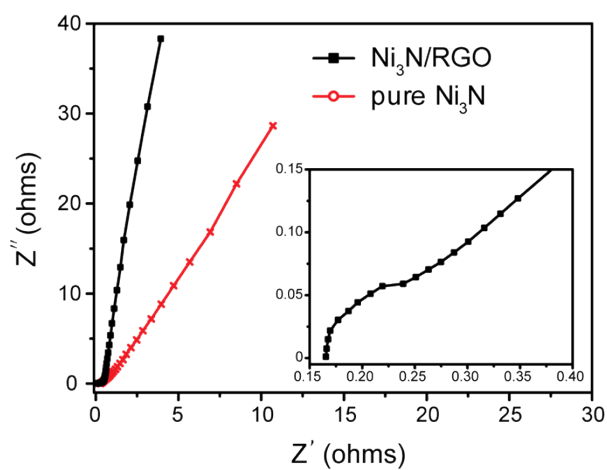

**Figure S7** Ragone plots of  $Ni_3N/RGO$  nanocomposite materials and pure  $Ni_3N$  nanoparticles in the three-electrode system, and the inset shows EIS information of  $Ni_3N/RGO$  in the high frequency region.

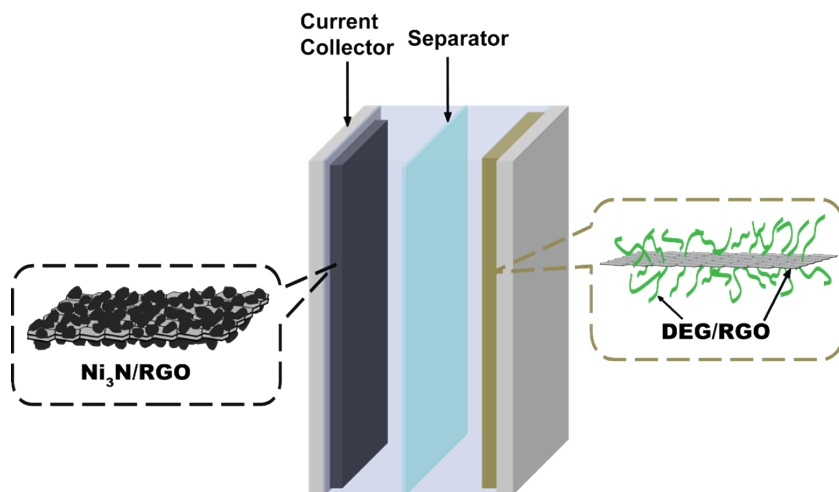

**Figure S8** Graphical structure of Ni<sub>3</sub>N/RGO//DEG/RGO asymmetric supercapacitor.
